# Supplementary material for: International Scope of Emergency Ultrasound: Barriers in Applying Ultrasound to Guide Central Line Placement by Providers in Nairobi, Kenya
Source: Hindawi journal article supplement (doi:10.1155/2018/7328465), 2018-01-01
Supplement: f1 [file 7328465.f1.pdf]

**Central Venous Catheter Insertion Survey:**

Year of Training / Number of years in practice: \_\_\_\_\_ / \_\_\_\_\_

Gender:        MALE            FEMALE

Specialty:    CRITICAL CARE        ANESTHESIA    EMERGENCY MEDICINE        OTHER

Number of prior central lines placed (circle one):    1        1-5        5-9        10-20        >20

Estimate the percentage of those patients in whom you were successful:

0-20%        21-40%        41-60%        61-80%        81-100%

When using the landmark technique, how often do you confirm venous cannulation before inserting the dilator (ABG, pressure transducer)?

0-20%        21-40%        41-60%        61-80%        81-100%

Any prior ultrasound training: YES    NO

If yes please specify:

What type of ultrasound (catheter insertion, FAST exams, cardiac exams, etc):

Level of comfort with ultrasound (circle one):

VERY    SOMEWHAT    NOT AT ALL    N/A

Have you used the ultrasound machine for central venous catheter insertion before:

YES    NO

**For each of the following please indicate your level of agreement:**

When compared to the landmark method, ultrasound guided central line placement:

Is easier to use

Strongly Agree        Agree        Neutral        Disagree        Strongly disagree

Is faster

Strongly Agree        Agree        Neutral        Disagree        Strongly disagree

Reduces complications such as pneumothorax, arterial puncture (etc)

Strongly Agree      Agree      Neutral      Disagree      Strongly disagree

Reduces infectious complications

Strongly Agree      Agree      Neutral      Disagree      Strongly disagree

Results in fewer placement failures

Strongly Agree      Agree      Neutral      Disagree      Strongly disagree

Is useful when the landmark method has been unsuccessful

Strongly Agree      Agree      Neutral      Disagree      Strongly disagree

Is useful when a patient lacks landmarks due to body habitus

Strongly Agree      Agree      Neutral      Disagree      Strongly disagree

Is less convenient

Strongly Agree      Agree      Neutral      Disagree      Strongly disagree

Is not needed (I am successful with the landmark method)

Strongly Agree      Agree      Neutral      Disagree      Strongly disagree

Will result in a loss of my skills

Strongly Agree      Agree      Neutral      Disagree      Strongly disagree

Is not cost effective

Strongly Agree      Agree      Neutral      Disagree      Strongly disagree

Is difficult to use due to resources

Strongly Agree      Agree      Neutral      Disagree      Strongly disagree

Do you perceive any difficulties in using ultrasound for central venous catheter insertion:

YES      NO

If yes, what are these specific barriers?
